# Supplementary material
Source: publisher site journal article supplement (https://www.dovepress.com/article/154525)
Supplement: Supplementary file 1 [file get_supplementary_file.php]

## Supplementary materials

**Table S1** Patient comorbidities by diagnosis

| <b>Total</b>                              | <b>Asthma<br/>n (%)</b> | <b>COPD<br/>n (%)</b> | <b>ACOS<br/>n (%)</b> |
|-------------------------------------------|-------------------------|-----------------------|-----------------------|
| <b>5348 (148.4)</b>                       | <b>4563 (143.4)</b>     | <b>469 (197.9)</b>    |                       |
| No other comorbidities                    | 950 (26.4)              | 614 (19.3)            | 27 (11.4)             |
| Alpha-1 antitrypsin deficiency            | 1 (0.0)                 | 4 (0.1)               | 1 (0.4)               |
| AIDS/HIV                                  | 5 (0.1)                 | 5 (0.2)               | 0 (0)                 |
| Allergic dermatitis                       | 224 (6.2)               | 15 (0.5)              | 7 (3.0)               |
| Allergic rhinitis                         | 1619 (44.9)             | 66 (2.1)              | 30 (12.7)             |
| Anemia                                    | 36 (1.0)                | 75 (2.4)              | 7 (3.0)               |
| Anxiety                                   | 408 (11.3)              | 391 (12.3)            | 42 (17.7)             |
| Arthritis                                 | 132 (3.7)               | 372 (11.7)            | 33 (13.9)             |
| Atopic dermatitis                         | 50 (1.4)                | 9 (0.3)               | 6 (2.5)               |
| Cancer                                    | 34 (0.9)                | 82 (2.6)              | 6 (2.5)               |
| Crohn's disease                           | 14 (0.4)                | 21 (0.7)              | 2 (0.8)               |
| Connective tissue/rheumatological disease | 17 (0.5)                | 10 (0.3)              | 0 (0)                 |
| Cystic fibrosis                           | 2 (0.1)                 | 0 (0)                 | 0 (0)                 |
| Dementia                                  | 5 (0.1)                 | 36 (1.1)              | 2 (0.8)               |
| Depression                                | 296 (8.2)               | 376 (11.8)            | 57 (24.1)             |
| Dermatitis/eczema                         | 48 (1.3)                | 23 (0.7)              | 4 (1.7)               |
| Diabetes                                  | 192 (5.3)               | 531 (16.7)            | 48 (20.3)             |
| Dyspepsia/stomach pain                    | 91 (2.5)                | 118 (3.7)             | 17 (7.2)              |
| Gastroesophageal reflux disease           | 378 (10.5)              | 397 (12.5)            | 47 (19.8)             |
| Glaucoma                                  | 25 (0.7)                | 82 (2.6)              | 6 (2.5)               |
| Hyperthyroidism                           | 40 (1.1)                | 45 (1.4)              | 5 (2.1)               |
| Idiopathic pulmonary fibrosis             | 1 (0.0)                 | 2 (0.1)               | 3 (1.3)               |
| Liver disease                             | 16 (0.4)                | 49 (1.5)              | 2 (0.8)               |
| Lung cancer                               | 4 (0.1)                 | 54 (1.7)              | 6 (2.5)               |
| Obesity                                   | 320 (8.9)               | 289 (9.1)             | 27 (11.4)             |
| Osteoporosis                              | 91 (2.5)                | 225 (7.1)             | 32 (13.5)             |
| Prostate disorder                         | 61 (1.7)                | 287 (9.0)             | 18 (7.6)              |
| Psoriasis                                 | 26 (0.7)                | 19 (0.6)              | 4 (1.7)               |

|                                       | <b>Asthma<br/>n (%)</b> | <b>COPD<br/>n (%)</b> | <b>ACOS<br/>n (%)</b> |
|---------------------------------------|-------------------------|-----------------------|-----------------------|
| <b>Total</b>                          | <b>5348 (148.4)</b>     | <b>4563 (143.4)</b>   | <b>469 (197.9)</b>    |
| Peptic ulcer disease                  | 14 (0.4)                | 59 (1.9)              | 3 (1.3)               |
| Renal failure                         | 19 (0.5)                | 83 (2.6)              | 4 (1.7)               |
| Sinusitis                             | 122 (3.4)               | 42 (1.3)              | 7 (3.0)               |
| Sleep apnea                           | 107 (3.0)               | 180 (5.7)             | 16 (6.8)              |
| Systematic sclerosis                  | 0 (0)                   | 2 (0.1)               | 0 (0)                 |
| <b>Cardiovascular conditions</b>      |                         |                       |                       |
|                                       | <b>Asthma<br/>n (%)</b> | <b>COPD<br/>n (%)</b> | <b>ACOS<br/>n (%)</b> |
| <b>Total</b>                          | <b>4135 (113.9)</b>     | <b>5226 (162.5)</b>   | <b>384 (161.3)</b>    |
| No cardiovascular comorbidities       | 2700 (74.3)             | 941 (29.3)            | 67 (28.2)             |
| Angina pectoris                       | 29 (0.8)                | 187 (5.8)             | 12 (5.0)              |
| Cardiac arrhythmias                   | 64 (1.8)                | 294 (9.1)             | 17 (7.1)              |
| Coagulated blood clotting disorder    | 2 (0.1)                 | 24 (0.8)              | 3 (1.3)               |
| Congestive heart failure              | 34 (0.9)                | 193 (6)               | 13 (5.5)              |
| Coronary artery disease               | 51 (1.4)                | 233 (7.2)             | 17 (7.1)              |
| Elevated cholesterol/hyperlipidemia   | 366 (10.1)              | 895 (27.8)            | 73 (30.7)             |
| Hypertension                          | 782 (21.5)              | 1900 (59.1)           | 138 (58.0)            |
| Myocardial infarction                 | 35 (1.0)                | 175 (5.4)             | 15 (6.3)              |
| Peripheral vascular disease           | 23 (0.6)                | 195 (6.1)             | 12 (5.0)              |
| Pulmonary arterial hypertension       | 20 (0.6)                | 70 (2.2)              | 5 (2.1)               |
| Cerebrovascular disease and/or stroke | 15 (0.4)                | 83 (2.6)              | 10 (4.2)              |
| Thrombosis                            | 14 (0.4)                | 36 (1.1)              | 2 (0.8)               |

**Abbreviation:** ACOS, asthma–COPD overlap syndrome.

**Table S2** Full list of maintenance treatments prescribed to patients (listed by country)

| <b>France</b>                        | <b>MDI</b> | <b>baMDI</b> | <b>DPI</b>  | <b>SMI</b> | <b>Unknown</b> | <b>Total</b> |
|--------------------------------------|------------|--------------|-------------|------------|----------------|--------------|
| Beclomethasone                       | 15         | 16           | 23          | 0          | 6              | 60           |
| Beclomethasone + formoterol FDC      | 84         | 0            | 0           | 0          | 0              | 84           |
| Budesonide                           | 7          | 0            | 59          | 0          | 0              | 66           |
| Ciclesonide                          | 6          | 0            | 0           | 0          | 0              | 6            |
| Fluticasone                          | 11         | 0            | 19          | 0          | 1              | 31           |
| Fluticasone + salmeterol FDC         | 65         | 0            | 339         | 0          | 24             | 428          |
| Formoterol                           | 13         | 7            | 40          | 0          | 3              | 63           |
| Formoterol + budesonide FDC          | 0          | 0            | 314         | 0          | 0              | 314          |
| Indacaterol                          | 0          | 0            | 172         | 0          | 0              | 172          |
| Mometasone                           | 0          | 0            | 6           | 0          | 0              | 6            |
| Salmeterol                           | 0          | 0            | 6           | 0          | 3              | 9            |
| Tiotropium                           | 0          | 0            | 366         | 58         | 0              | 424          |
| <b>Total</b>                         | <b>201</b> | <b>23</b>    | <b>1344</b> | <b>58</b>  | <b>37</b>      | <b>1663</b>  |
| Aclidinium                           | 0          | 0            | 23          | 0          | 0              | 23           |
| Beclomethasone                       | 7          | 5            | 14          | 0          | 9              | 35           |
| Beclomethasone + formoterol FDC      | 94         | 0            | 0           | 0          | 0              | 94           |
| Budesonide                           | 27         | 0            | 104         | 0          | 0              | 131          |
| Ciclesonide                          | 4          | 0            | 0           | 0          | 0              | 4            |
| Fluticasone                          | 5          | 0            | 14          | 0          | 1              | 20           |
| Fluticasone + formoterol FDC         | 9          | 0            | 0           | 0          | 0              | 9            |
| Fluticasone + salmeterol FDC         | 35         | 0            | 180         | 0          | 22             | 237          |
| Fluticasone furoate + vilnaterol FDC | 0          | 0            | 1           | 0          | 0              | 1            |
| Formoterol                           | 17         | 29           | 62          | 0          | 16             | 124          |
| Formoterol + budesonide FDC          | 0          | 0            | 276         | 0          | 0              | 276          |
| Glycopyrronium                       | 0          | 0            | 18          | 0          | 0              | 18           |
| Glycopyrronium + indacaterol FDC     | 0          | 0            | 13          | 0          | 0              | 13           |
| Indacaterol                          | 0          | 0            | 16          | 0          | 0              | 16           |
| Salmeterol                           | 0          | 3            | 3           | 0          | 6              | 12           |
| Tiotropium                           | 0          | 0            | 307         | 31         | 0              | 338          |
| <b>Total</b>                         | <b>198</b> | <b>37</b>    | <b>1031</b> | <b>31</b>  | <b>54</b>      | <b>1351</b>  |

| <b>Italy</b>                    | <b>MDI</b> | <b>baMDI</b> | <b>DPI</b> | <b>SMI</b> | <b>Unknown</b> | <b>Total</b> |
|---------------------------------|------------|--------------|------------|------------|----------------|--------------|
| Aclidinium                      | 0          | 0            | 33         | 0          | 0              | 33           |
| Beclomethasone                  | 9          | 0            | 1          | 0          | 2              | 12           |
| Beclomethasone + formoterol FDC | 176        | 0            | 0          | 0          | 0              | 176          |
| Budesonide                      | 6          | 0            | 14         | 0          | 0              | 20           |
| Ciclesonide                     | 23         | 0            | 0          | 0          | 0              | 23           |
| Flunisolide                     | 5          | 0            | 0          | 0          | 0              | 5            |
| Fluticasone                     | 68         | 0            | 14         | 0          | 5              | 87           |
| Fluticasone + formoterol FDC    | 26         | 0            | 0          | 0          | 0              | 26           |
| Fluticasone + salmeterol FDC    | 121        | 0            | 297        | 0          | 31             | 449          |
| Formoterol                      | 17         | 5            | 5          | 0          | 3              | 30           |
| Formoterol + budesonide FDC     | 0          | 0            | 189        | 0          | 0              | 189          |
| Glycopyrronium                  | 0          | 0            | 48         | 0          | 0              | 48           |
| Indacaterol                     | 0          | 0            | 66         | 0          | 0              | 66           |
| Mometasone                      | 0          | 0            | 18         | 0          | 0              | 18           |
| Salmeterol                      | 19         | 3            | 21         | 0          | 13             | 56           |
| Tiotropium                      | 0          | 0            | 261        | 27         | 0              | 288          |
| <b>Total</b>                    | <b>470</b> | <b>8</b>     | <b>967</b> | <b>27</b>  | <b>54</b>      | <b>1526</b>  |

|                                 |            |          |             |           |           |             |
|---------------------------------|------------|----------|-------------|-----------|-----------|-------------|
| Aclidinium                      | 0          | 0        | 83          | 0         | 0         | 83          |
| Beclomethasone                  | 3          | 0        | 2           | 0         | 2         | 7           |
| Beclomethasone + formoterol FDC | 103        | 0        | 0           | 0         | 0         | 103         |
| Budesonide                      | 24         | 0        | 72          | 0         | 0         | 96          |
| Ciclesonide                     | 25         | 0        | 0           | 0         | 0         | 25          |
| Fluticasone                     | 3          | 1        | 8           | 0         | 0         | 12          |
| Fluticasone + salmeterol FDC    | 77         | 0        | 241         | 0         | 30        | 348         |
| Formoterol                      | 3          | 2        | 12          | 0         | 9         | 26          |
| Formoterol + budesonide FDC     | 0          | 0        | 328         | 0         | 0         | 328         |
| Glycopyrronium                  | 0          | 0        | 50          | 0         | 0         | 50          |
| Indacaterol                     | 0          | 0        | 127         | 0         | 0         | 127         |
| Mometasone                      | 0          | 0        | 13          | 0         | 0         | 13          |
| Salmeterol                      | 5          | 0        | 12          | 0         | 7         | 24          |
| Tiotropium                      | 0          | 0        | 354         | 19        | 0         | 373         |
| <b>Total</b>                    | <b>243</b> | <b>3</b> | <b>1302</b> | <b>19</b> | <b>48</b> | <b>1615</b> |

| <b>UK</b>                       | <b>MDI</b> | <b>baMDI</b> | <b>DPI</b> | <b>SMI</b> | <b>Unknown</b> | <b>Total</b> |
|---------------------------------|------------|--------------|------------|------------|----------------|--------------|
| Acclidinium                     | 0          | 0            | 7          | 0          | 0              | 7            |
| Beclomethasone                  | 93         | 10           | 7          | 0          | 32             | 142          |
| Beclomethasone + formoterol FDC | 39         | 0            | 0          | 0          | 0              | 39           |
| Budesonide                      | 1          | 0            | 14         | 0          | 0              | 15           |
| Ciclesonide                     | 3          | 0            | 0          | 0          | 0              | 3            |
| Fluticasone                     | 11         | 0            | 10         | 0          | 2              | 23           |
| Fluticasone + formoterol FDC    | 3          | 0            | 0          | 0          | 0              | 3            |
| Fluticasone + salmeterol FDC    | 114        | 0            | 227        | 0          | 71             | 412          |
| Formoterol                      | 2          | 0            | 1          | 0          | 0              | 3            |
| Formoterol + budesonide FDC     | 0          | 0            | 288        | 0          | 0              | 288          |
| Glycopyrronium                  | 0          | 0            | 17         | 0          | 0              | 17           |
| Indacaterol                     | 0          | 0            | 8          | 0          | 0              | 8            |
| Salmeterol                      | 10         | 1            | 2          | 0          | 7              | 20           |
| Tiotropium                      | 0          | 0            | 415        | 20         | 0              | 435          |
| <b>Total</b>                    | <b>276</b> | <b>11</b>    | <b>996</b> | <b>20</b>  | <b>112</b>     | <b>1415</b>  |

|                                      |            |          |             |           |           |             |
|--------------------------------------|------------|----------|-------------|-----------|-----------|-------------|
| Acclidinium                          | 0          | 0        | 43          | 0         | 0         | 43          |
| Beclomethasone                       | 80         | 5        | 3           | 0         | 2         | 90          |
| Budesonide                           | 2          | 0        | 57          | 0         | 0         | 59          |
| Ciclesonide                          | 7          | 0        | 0           | 0         | 0         | 7           |
| Fluticasone                          | 78         | 2        | 22          | 0         | 3         | 105         |
| Fluticasone + salmeterol FDC         | 82         | 0        | 619         | 0         | 40        | 741         |
| Fluticasone furoate + vilanterol FDC | 0          | 0        | 2           | 0         | 0         | 2           |
| Formoterol                           | 0          | 0        | 13          | 0         | 2         | 15          |
| Formoterol + budesonide FDC          | 308        | 0        | 0           | 0         | 0         | 308         |
| Indacaterol                          | 0          | 0        | 15          | 0         | 0         | 15          |
| Mometasone                           | 0          | 0        | 41          | 0         | 0         | 41          |
| Mometasone + formoterol FDC          | 112        | 0        | 0           | 0         | 0         | 112         |
| Salmeterol                           | 14         | 0        | 15          | 0         | 3         | 32          |
| Tiotropium                           | 0          | 0        | 501         | 13        | 0         | 514         |
| Triamcinolone                        | 2          | 0        | 0           | 0         | 0         | 2           |
| <b>Total</b>                         | <b>685</b> | <b>7</b> | <b>1331</b> | <b>13</b> | <b>50</b> | <b>2086</b> |

| <b>Japan</b>                 | <b>MDI</b> | <b>baMDI</b> | <b>DPI</b> | <b>SMI</b> | <b>Unknown</b> | <b>Total</b> |
|------------------------------|------------|--------------|------------|------------|----------------|--------------|
| Beclomethasone               | 13         | 0            | 3          | 0          | 1              | 17           |
| Budesonide                   | 2          | 0            | 23         | 0          | 2              | 27           |
| Ciclesonide                  | 29         | 0            | 0          | 0          | 0              | 29           |
| Fluticasone                  | 15         | 0            | 48         | 0          | 12             | 75           |
| Fluticasone + salmeterol FDC | 33         | 0            | 281        | 0          | 70             | 384          |
| Formoterol                   | 0          | 0            | 1          | 0          | 0              | 1            |
| Formoterol + budesonide FDC  | 0          | 0            | 215        | 0          | 0              | 215          |
| Glycopyrronium               | 0          | 0            | 3          | 0          | 0              | 3            |
| Indacaterol                  | 0          | 0            | 74         | 0          | 0              | 74           |
| Mometasone                   | 0          | 0            | 9          | 0          | 0              | 9            |
| Olodaterol                   | 0          | 0            | 0          | 1          | 0              | 1            |
| Salmeterol                   | 4          | 0            | 35         | 0          | 8              | 47           |
| Tiotropium                   | 0          | 0            | 268        | 155        | 0              | 423          |
| <b>Total</b>                 | <b>96</b>  | <b>0</b>     | <b>960</b> | <b>156</b> | <b>93</b>      | <b>1305</b>  |

|                              |            |           |            |          |           |             |
|------------------------------|------------|-----------|------------|----------|-----------|-------------|
| Bambuterol                   | 0          | 1         | 0          | 0        | 0         | 1           |
| Beclomethasone               | 0          | 1         | 0          | 0        | 2         | 3           |
| Budesonide                   | 21         | 1         | 75         | 0        | 3         | 100         |
| Dexamethasone                | 0          | 0         | 0          | 1        | 1         | 2           |
| Fluticasone                  | 4          | 5         | 1          | 0        | 3         | 13          |
| Fluticasone + salmeterol FDC | 225        | 0         | 389        | 0        | 10        | 624         |
| Formoterol                   | 2          | 1         | 4          | 1        | 4         | 12          |
| Formoterol + budesonide FDC  | 0          | 0         | 147        | 0        | 0         | 147         |
| ICS/LABA (nfs)               | 0          | 1         | 8          | 0        | 0         | 9           |
| Indacaterol                  | 0          | 0         | 1          | 0        | 0         | 1           |
| LAMA (nfs)                   | 0          | 1         | 0          | 0        | 0         | 1           |
| Mometasone                   | 0          | 0         | 2          | 0        | 0         | 2           |
| Other (not stated)           | 0          | 0         | 0          | 0        | 2         | 2           |
| Salmeterol                   | 24         | 2         | 31         | 0        | 7         | 64          |
| Tiotropium                   | 0          | 0         | 60         | 1        | 0         | 61          |
| Tulobuterol                  | 0          | 0         | 1          | 0        | 0         | 1           |
| <b>Total</b>                 | <b>276</b> | <b>13</b> | <b>719</b> | <b>3</b> | <b>32</b> | <b>1043</b> |

| <b>Global</b>                        | <b>MDI</b>  | <b>baMDI</b> | <b>DPI</b>  | <b>SMI</b> | <b>Unknown</b> | <b>Total</b> |
|--------------------------------------|-------------|--------------|-------------|------------|----------------|--------------|
| Aclidinium                           | 0           | 0            | 189         | 0          | 0              | 189          |
| Bambuterol                           | 0           | 1            | 0           | 0          | 0              | 1            |
| Beclomethasone                       | 220         | 37           | 53          | 0          | 56             | 366          |
| Beclomethasone + formoterol FDC      | 496         | 0            | 0           | 0          | 0              | 496          |
| Budesonide                           | 90          | 1            | 418         | 0          | 5              | 514          |
| Ciclesonide                          | 97          | 0            | 0           | 0          | 0              | 97           |
| Dexamethasone                        | 0           | 0            | 0           | 1          | 1              | 2            |
| Flunisolide                          | 5           | 0            | 0           | 0          | 0              | 5            |
| Fluticasone                          | 195         | 8            | 136         | 0          | 27             | 366          |
| Fluticasone + formoterol FDC         | 38          | 0            | 0           | 0          | 0              | 38           |
| Fluticasone + salmeterol FDC         | 752         | 0            | 2573        | 0          | 298            | 3623         |
| Fluticasone furoate + vilanterol FDC | 0           | 0            | 3           | 0          | 0              | 3            |
| Formoterol                           | 54          | 44           | 138         | 1          | 37             | 274          |
| Formoterol + budesonide FDC          | 308         | 0            | 1757        | 0          | 0              | 2065         |
| Glycopyrronium                       | 0           | 0            | 136         | 0          | 0              | 136          |
| Glycopyrronium + indacaterol FDC     | 0           | 0            | 13          | 0          | 0              | 13           |
| ICS/LABA (nfs)                       | 0           | 1            | 8           | 0          | 0              | 9            |
| Indacaterol                          | 0           | 0            | 479         | 0          | 0              | 479          |
| LAMA (nfs)                           | 0           | 1            | 0           | 0          | 0              | 1            |
| Mometasone                           | 0           | 0            | 89          | 0          | 0              | 89           |
| Mometasone + formoterol FDC          | 112         | 0            | 0           | 0          | 0              | 112          |
| Olodaterol                           | 0           | 0            | 0           | 1          | 0              | 1            |
| Other (not stated)                   | 0           | 0            | 0           | 0          | 2              | 2            |
| Salmeterol                           | 76          | 9            | 125         | 0          | 54             | 264          |
| Tiotropium                           | 0           | 0            | 2532        | 324        | 0              | 2856         |
| Triamcinolone                        | 2           | 0            | 0           | 0          | 0              | 2            |
| Tulobuterol                          | 0           | 0            | 1           | 0          | 0              | 1            |
| <b>Total</b>                         | <b>2445</b> | <b>102</b>   | <b>8650</b> | <b>327</b> | <b>480</b>     | <b>12004</b> |

**Abbreviations:** baMDI, breath actuated metered dose inhaler; DPI, dry powder inhaler;

FDC, fixed dose combination; ICS, inhaled corticosteroid; LABA, long-acting  $\beta_2$ -agonist;

LAMA, long-acting muscarinic antagonist; MDI, metered dose inhaler; nfs, not further

specified; SMI, soft mist inhaler.

**Table S3** Full list of inhaler attributes ranked for importance by patients (5-point Likert scale)

|                                                                     | <b>Asthma<br/>% (n)</b> | <b>COPD<br/>% (n)</b> | <b>ACOS<br/>% (n)</b> |
|---------------------------------------------------------------------|-------------------------|-----------------------|-----------------------|
| It is built to last and will not break easily                       | 27.5 (407)              | 34.7 (224)            | 29.0 (11)             |
| The instructions are simple and easy to follow                      | 54.6 (808)              | 60.9 (393)            | 52.6 (20)             |
| No need for me to put the medicine into the inhaler before I use it | 31.4 (465)              | 25.3 (163)            | 15.8 (6)              |
| I do not need to breathe in at the same time as I press my inhaler  | 17.2 (254)              | 19.4 (125)            | 18.4 (7)              |
| I do not need to breathe in hard to inhale my medicine              | 17.4 (257)              | 20 (129)              | 23.7 (9)              |
| I get the same amount of medicine delivered to my lungs each time   | 28.2 (417)              | 29.3 (189)            | 18.4 (7)              |
| It tells me when my dose of medicine has been inhaled correctly     | 12.8 (189)              | 12.1 (78)             | 15.8 (6)              |
| It tells me how many doses of my medicine I have left               | 24.1 (357)              | 15.5 (100)            | 21.1 (8)              |
| Can reuse the inhaler for more than 1 month                         | 7.8 (115)               | 10.2 (66)             | 7.9 (3)               |
| The inhaler locks when it is empty so I cannot use it any more      | 4.6 (68)                | 3.6 (23)              | 7.9 (3)               |
| Low/no irritation in mouth and throat                               | 19.5 (288)              | 19.2 (124)            | 7.9 (3)               |
| Easy to hold and carry around with me                               | 33.3 (493)              | 29.2 (188)            | 23.7 (9)              |
| <b>Total</b>                                                        | <b>278.1 (4118)</b>     | <b>279.4 (1802)</b>   | <b>242.1 (92)</b>     |

**Abbreviation:** ACOS, asthma–COPD overlap syndrome.



**Table S4** Number of patient comorbidities by whether inhaler device is a reason for choice

|                                              | Ease of use/suitability of inhaler device is: |                     | <i>P</i> -value between groups |
|----------------------------------------------|-----------------------------------------------|---------------------|--------------------------------|
|                                              | NOT a reason for choice                       | A reason for choice |                                |
| <b>Asthma</b>                                |                                               |                     |                                |
|                                              | n=1869                                        | n=978               |                                |
| No other comorbidities, % (n)                | 31.1 (581)                                    | 21.2 (213)          | <0.0001                        |
|                                              | n=1932                                        | n=1012              |                                |
| Total number of comorbidities, mean (95% CI) | 2.1 (2–2.6)                                   | 2.5 (2.4–2.7)       | <0.0001                        |
| <b>COPD</b>                                  |                                               |                     |                                |
|                                              | n=1815                                        | n=947               |                                |
| No other comorbidities, % (n)                | 21.9 (390)                                    | 17.2 (151)          | 0.0048                         |
|                                              | n=1851                                        | n=909               |                                |
| Total number of comorbidities, mean (95% CI) | 3.6 (3.5–3.8)                                 | 4.5 (4.3–4.8)       | <0.0001                        |
| <b>ACOS</b>                                  |                                               |                     |                                |
|                                              | n=121                                         | n=61                |                                |
| No other comorbidities, % (n)                | 14.3 (17)                                     | 12.1 (7)            | 0.8167                         |
|                                              | n=121                                         | n=61                |                                |
| Total number of comorbidities, mean (95% CI) | 4.8 (4.0–5.5)                                 | 5.4 (4.3–6.5)       | 0.2423                         |

**Abbreviations:** ACOS, asthma–COPD overlap syndrome; CI, confidence interval.

**Table S5** Current device type by whether inhaler device is a reason for choice

|                      | Ease of use/suitability of inhaler device is: |                        | <i>P</i> -value<br>between<br>groups |
|----------------------|-----------------------------------------------|------------------------|--------------------------------------|
|                      | NOT a reason<br>for choice                    | A reason<br>for choice |                                      |
| <b>Asthma, % (n)</b> | n=1939                                        | n=1014                 |                                      |
| MDI                  | 34.7 (673)                                    | 34.2 (347)             | 0.8069                               |
| baMDI                | 1.1 (21)                                      | 1.5 (15)               | 0.3788                               |
| DPI                  | 62.9 (1220)                                   | 66.0 (669)             | 0.1064                               |
| SMI                  | 0.3 (6)                                       | 0.6 (6)                | 0.3601                               |
| Unknown device       | 4.3 (84)                                      | 3.3 (33)               | 0.1651                               |
| <b>COPD, % (n)</b>   | n=1861                                        | n=911                  |                                      |
| MDI                  | 18.9 (351)                                    | 16.5 (150)             | 0.1278                               |
| baMDI                | 0.8 (15)                                      | 1.1 (10)               | 0.5214                               |
| DPI                  | 87.6 (1631)                                   | 90.0 (820)             | 0.0672                               |
| SMI                  | 3.9 (73)                                      | 5.9 (54)               | 0.0202                               |
| Unknown device       | 4.6 (86)                                      | 2.7 (25)               | 0.0176                               |
| <b>ACOS, % (n)</b>   | n=121                                         | n=61                   |                                      |
| MDI                  | 29.8 (36)                                     | 18.0 (11)              | 0.1071                               |
| baMDI                | 1.7 (2)                                       | 0 (0)                  | 0.5519                               |
| DPI                  | 82.6 (100)                                    | 86.9 (53)              | 0.5256                               |
| SMI                  | 2.5 (3)                                       | 1.6 (1)                | 1                                    |
| Unknown device       | 5.8 (7)                                       | 11.5 (7)               | 0.2375                               |

**Abbreviations:** ACOS, asthma–COPD overlap syndrome; baMDI, breath actuated metered dose inhaler; DPI, dry powder inhaler; MDI, metered dose inhaler; SMI, soft mist inhaler.

**Figure S1** Inhaler satisfaction as reported by patients by diagnosis (not at all/slightly satisfied)

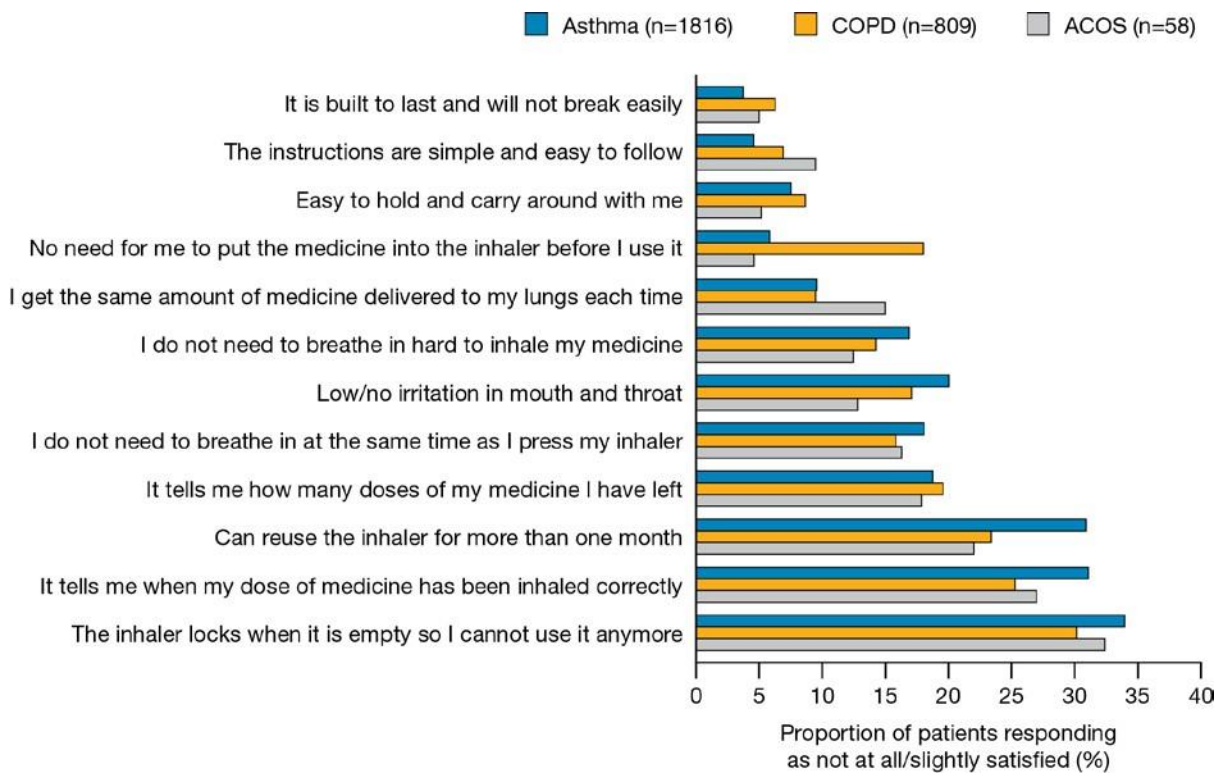

**Abbreviation:** ACOS, asthma–COPD overlap syndrome.
